# Supplementary material
Source: PubMed Central journal article supplement (PMC7147832)
Supplement: NIHMS1556365-supplement-3.pdf [file NIHMS1556365-supplement-3.pdf]

Fig 1d: Anti-ATF4

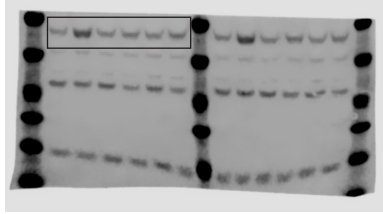

kDa Anti-Actin

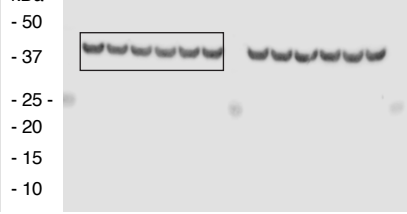

Same blot

Fig 2e: Anti-ATF4

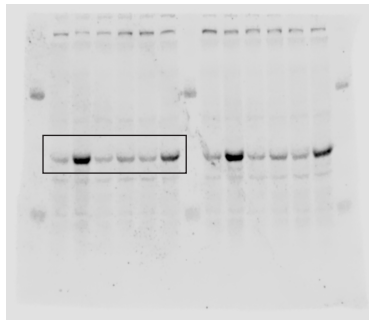

kDa Anti-Actin

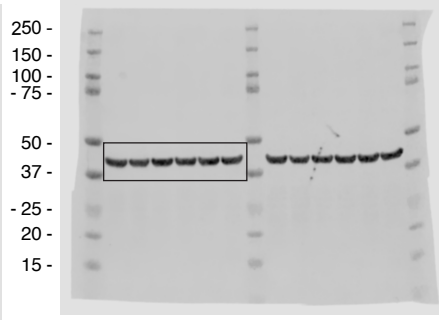

Same blot

Fig 3a:

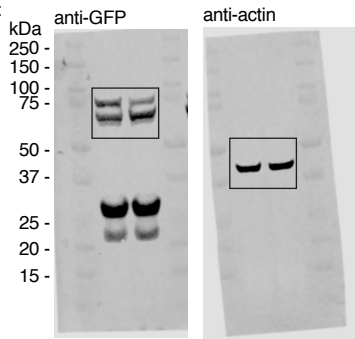

same samples  
on two blots

Fig 3c:

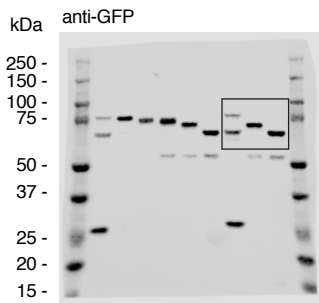

Fig 3d:

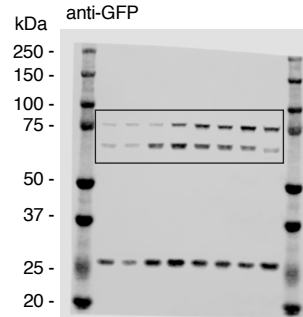

### Supplementary Figure 1

Source Data (Immunoblots). The original source images for all data obtained by electrophoretic separation. The full scanned images show the uncropped form with molecular weight markers and loading controls. Blots are labeled according to the corresponding Figure panel within the main or Extended Data Figures.

Fig 3f:

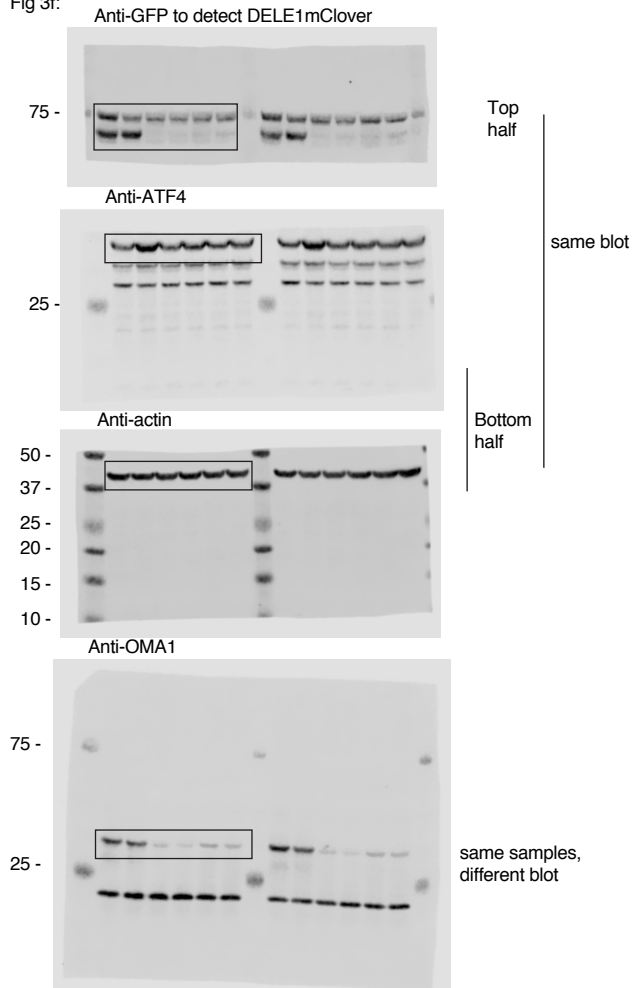

Fig 4a:

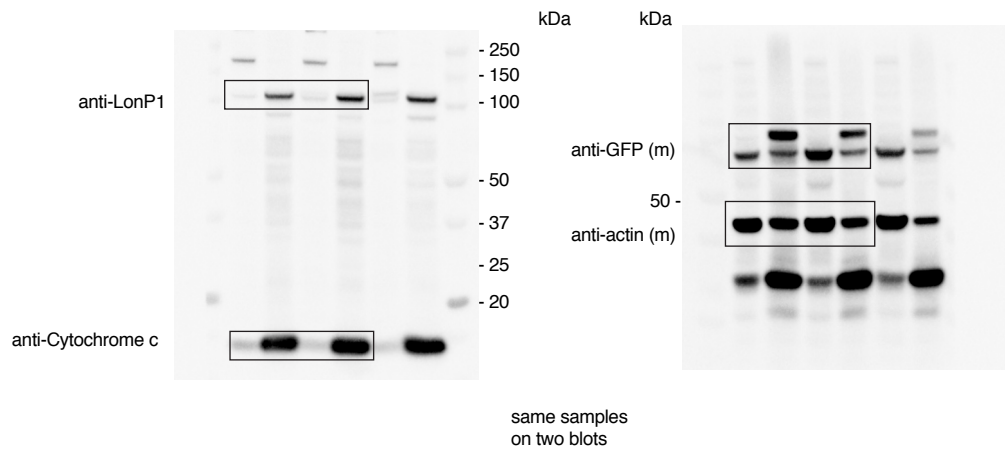

Fig 4b:

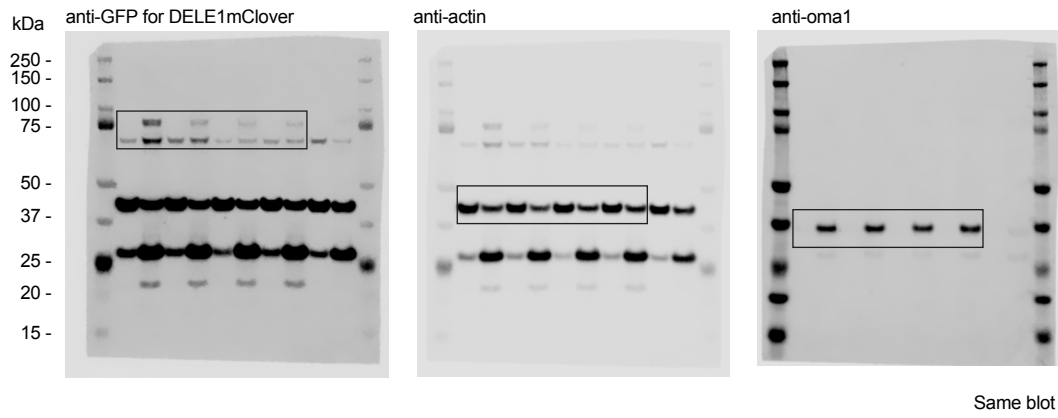

Fig 4d:

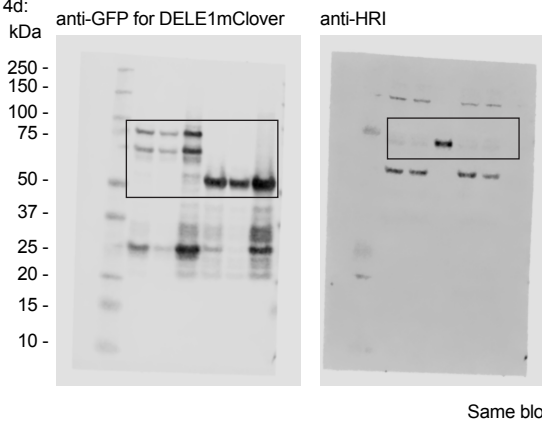

Fig 4e:

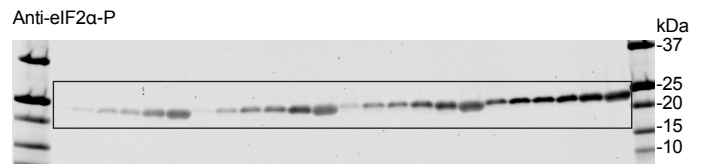

Fig 4g:

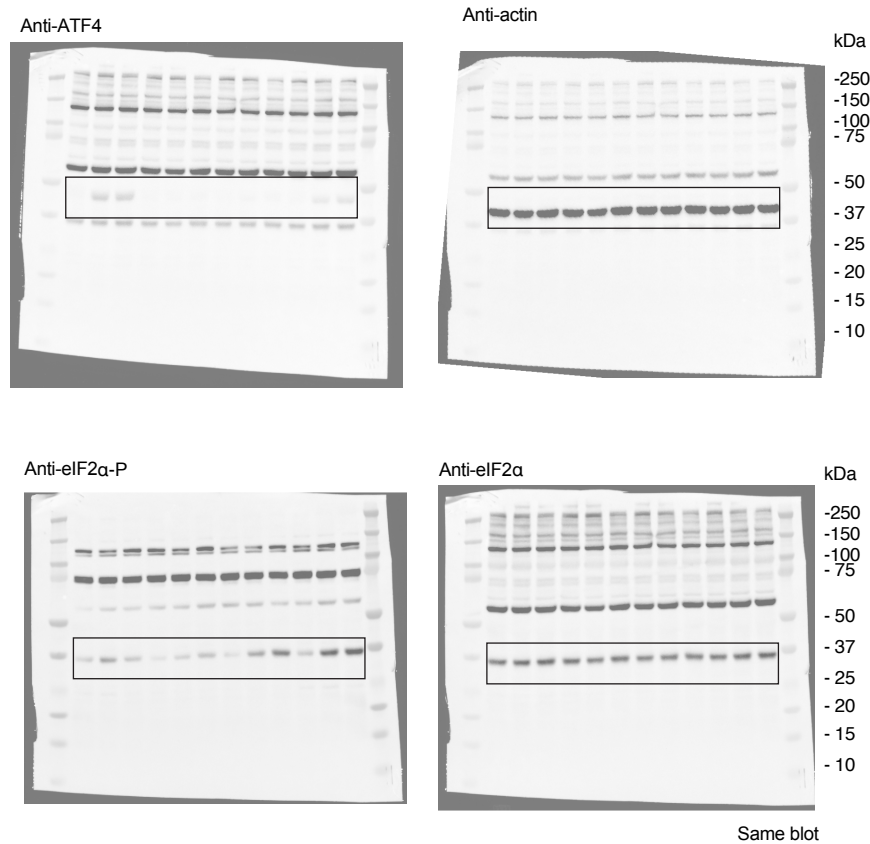

Extended Data Figure 2c:

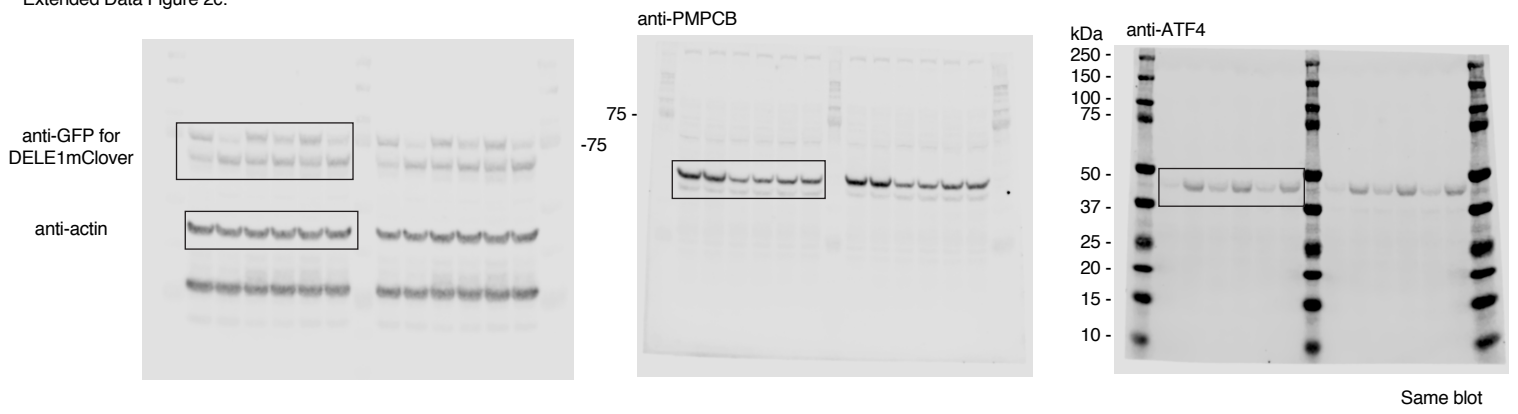

Extended Data Figure 2g:

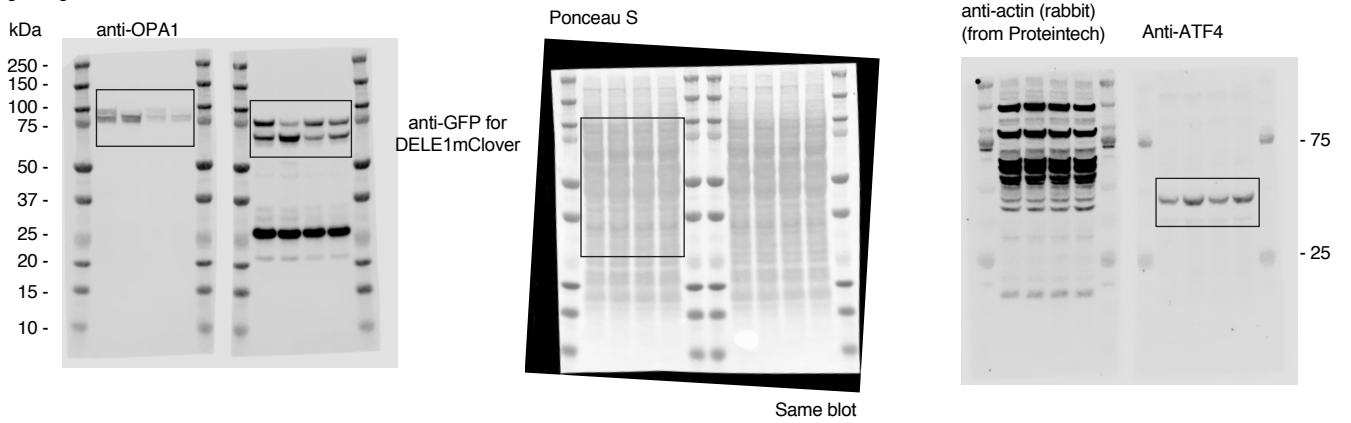

Extended Data Figure 2i:

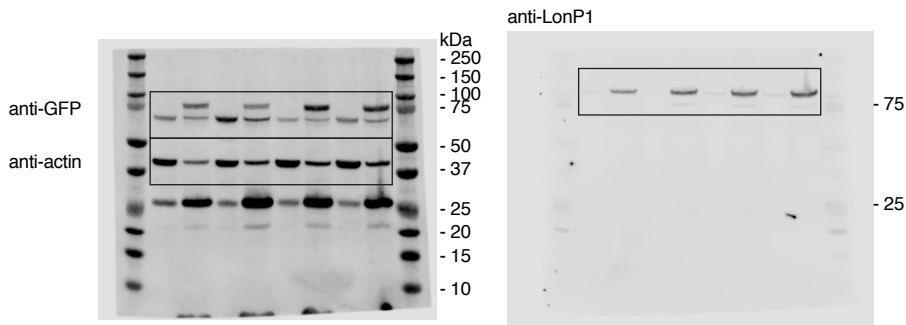

Extended Data Figure 3c:

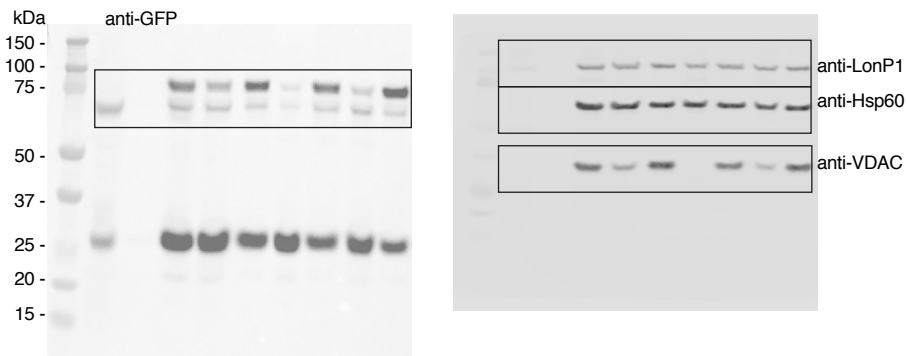



Extended Data Figure 5a:

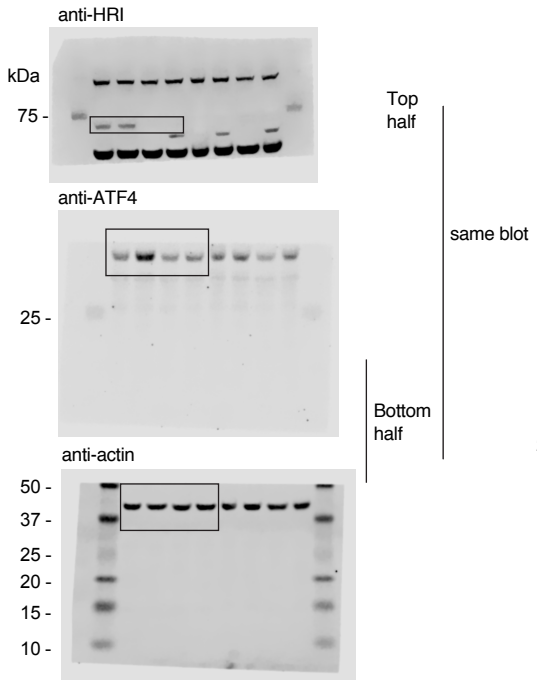

Extended Data Figure 6a:

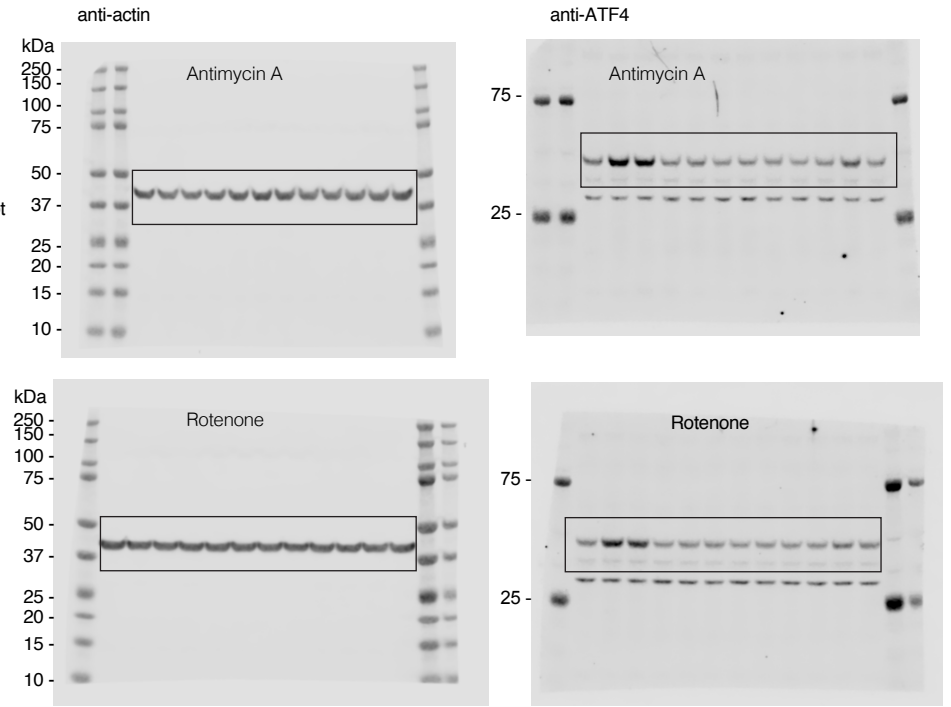

Extended Data Figure 6b:

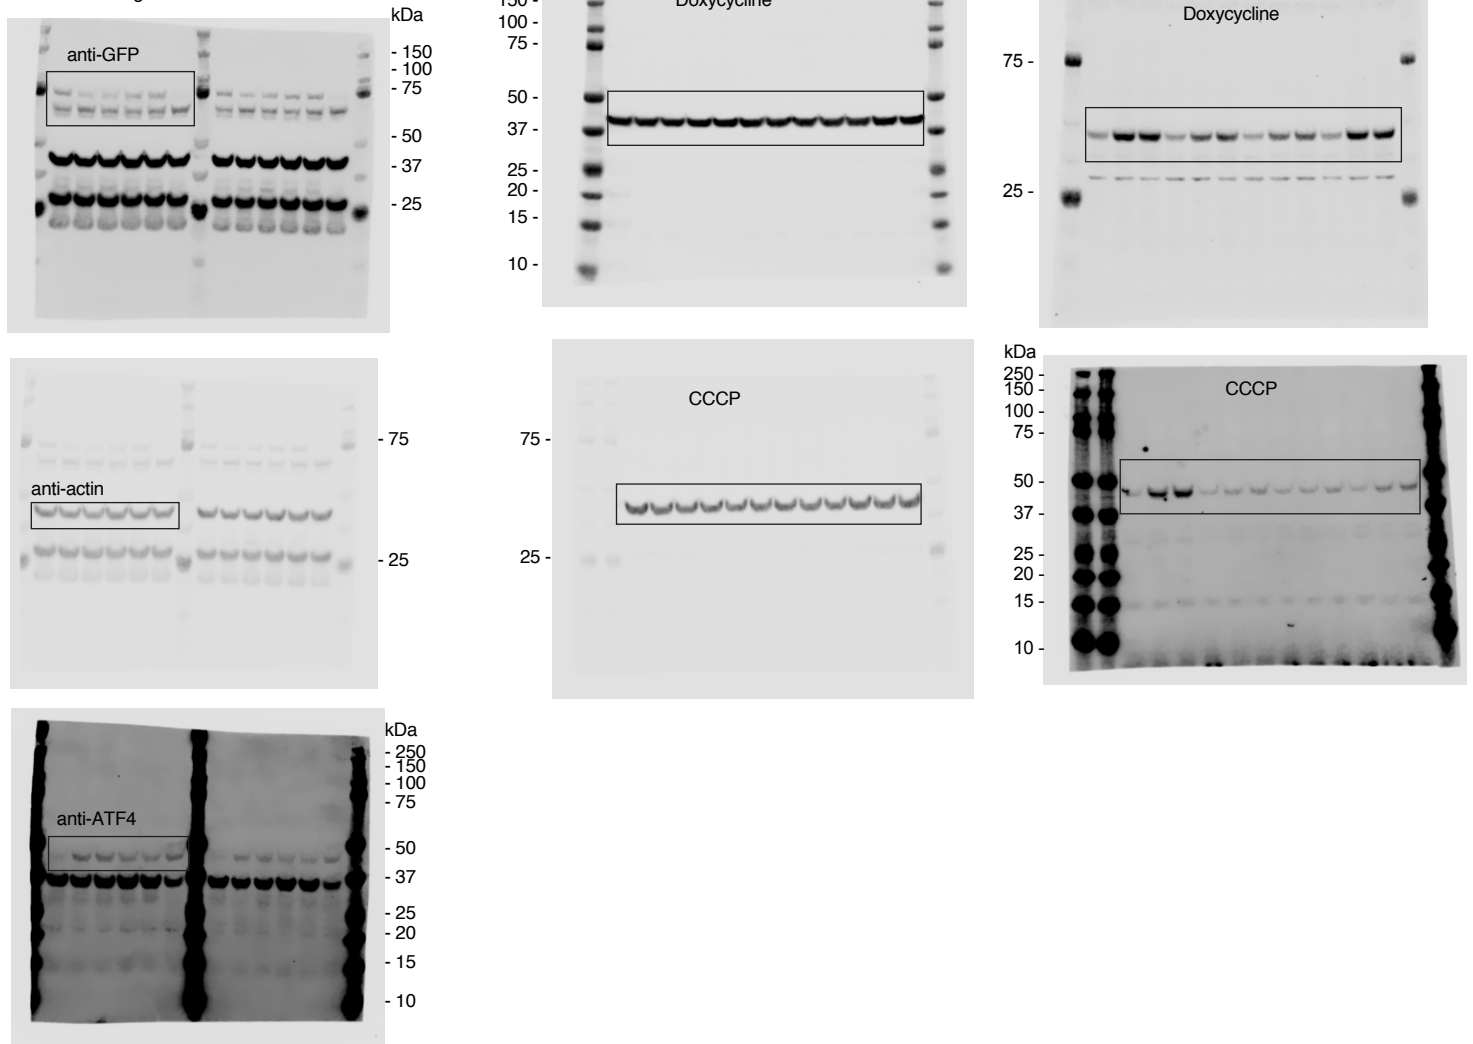

Extended Data Figure 6c:

anti-LonP1

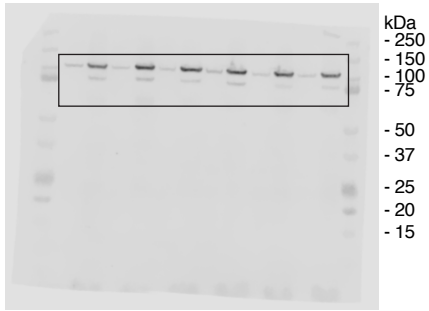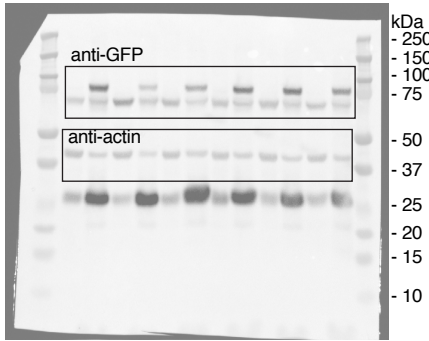

same blot

Extended Data Figure 6d:

anti-ATF4

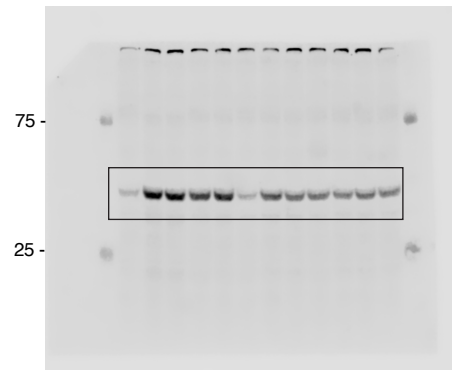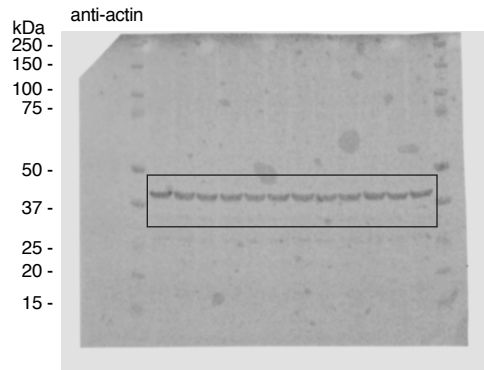

anti-OPA1

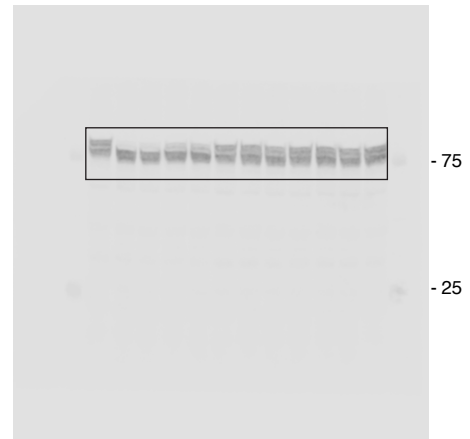

same blot

Extended Data Figure 6e:

anti-actin

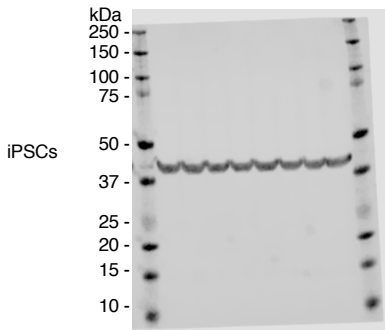

anti-ATF4

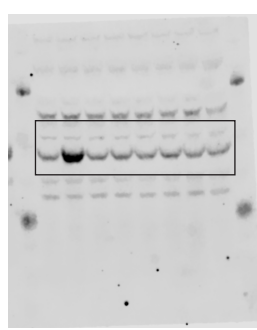

same blot

Extended Data Figure 6f:

anti-actin

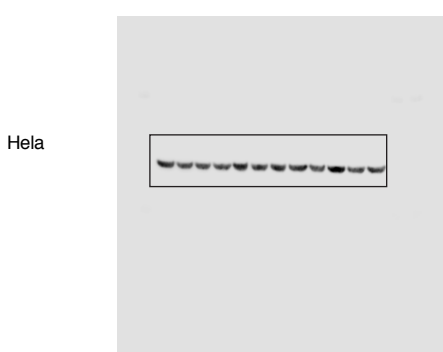

anti-ATF4

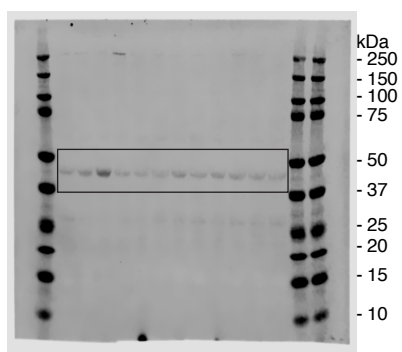

same blot
