# Supplementary material
Source: PubMed Central journal article supplement (PMC7147832)
Supplement: NIHMS1556365-supplement-4.pdf [file NIHMS1556365-supplement-4.pdf]

The Gating strategy for Fig 2f and 2g:

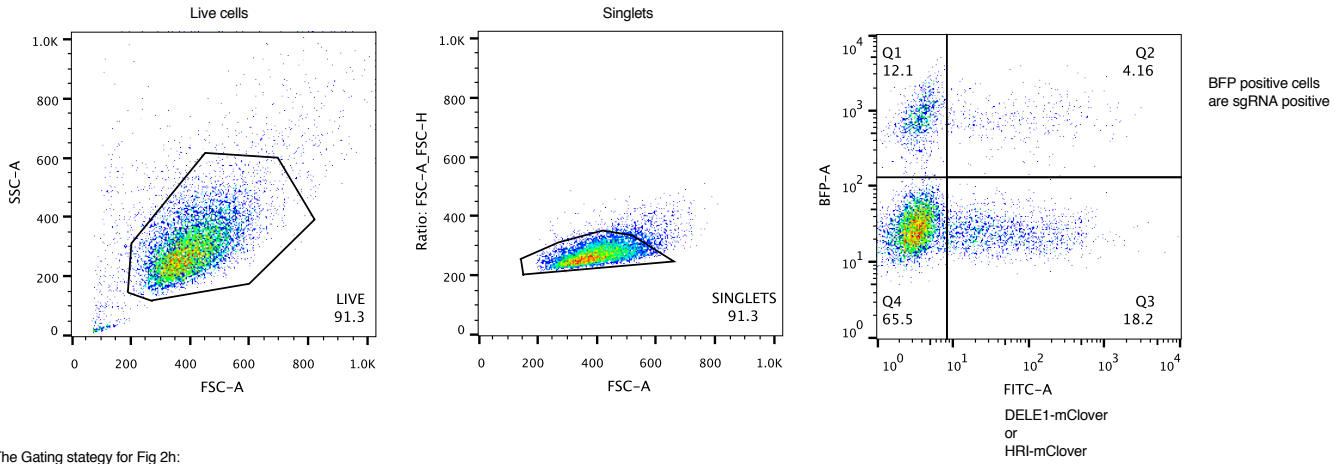

The Gating strategy for Fig 2h:

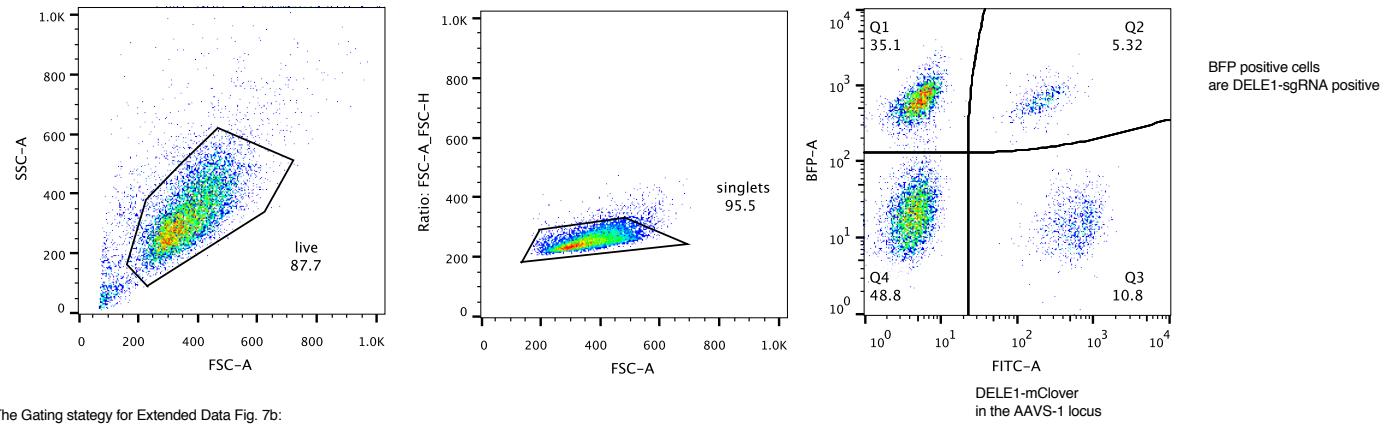

The Gating strategy for Extended Data Fig. 7b:

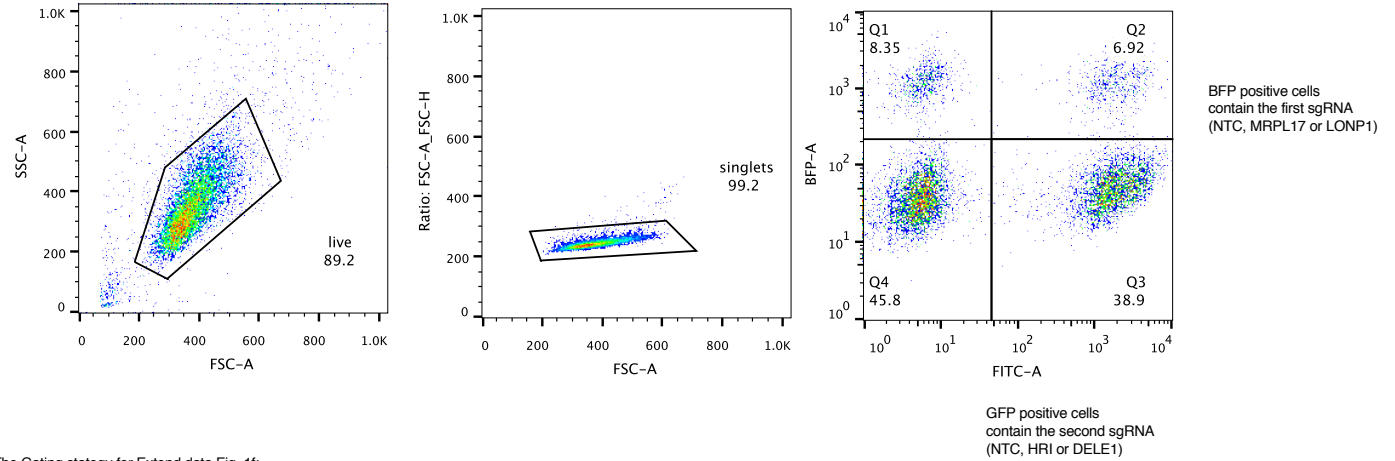

The Gating strategy for Extend data Fig. 1f:

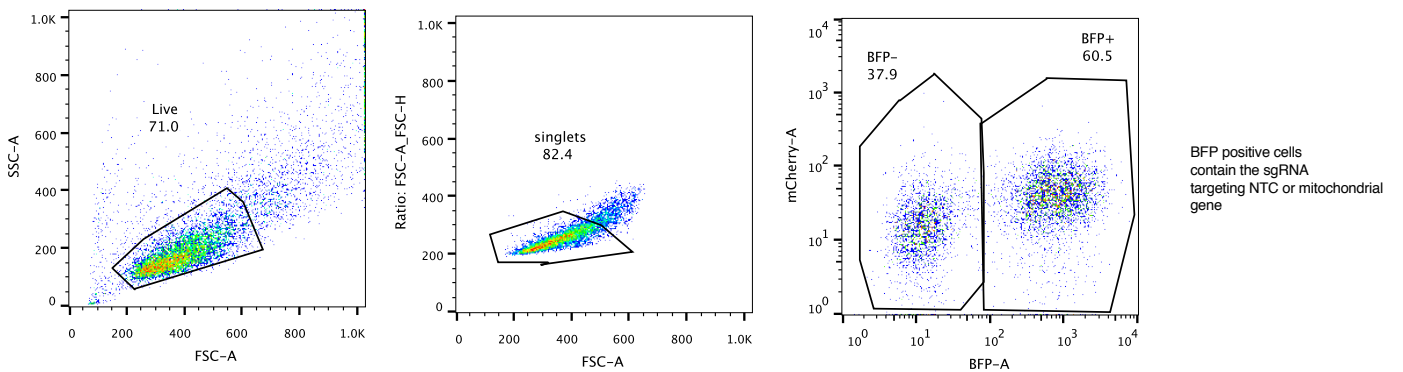

## Supplementary Figure 2

Gating Strategies (Flow cytometry). Representative flow cytometry data with gating strategies. Similar results were obtained in at least  $n = 2$  independent experiments.
